# Supplementary material for: Antibacterial and Antioxidant Compounds from the Root Extract of Aloe debrana
Source: Hindawi journal article supplement (doi:10.1155/2024/6651648), 2024-05-07
Supplement: f1 [file 6651648.f1.pdf]

## Supporting Information

### Antibacterial and antioxidant compounds from the roots extract of *Aloe debrana*

Tokuma Getahun,<sup>1,\*</sup> Joydeep Das,<sup>2</sup> Parames C. Sil,<sup>3</sup> and Neeraj Gupta<sup>4</sup>

<sup>1</sup>Department of Chemistry, Asella College of Teachers Education, Asella, Oromia, Ethiopia

<sup>2</sup>Department of Chemistry, Physical Sciences, Mizoram University, Aizawl, Mizoram 796004, India

<sup>3</sup>Division of Molecular Medicine, Bose Institute, P-1/12, CIT Scheme VII M, Kolkata 700054, India

<sup>4</sup>Department of Chemistry and Chemical Sciences, Central University of Himachal Pradesh, Dharamshala, Kangra 176215, HP, India

\*Corresponding author.

### List of Supporting Information

|                                                                                                                                                 |   |
|-------------------------------------------------------------------------------------------------------------------------------------------------|---|
| <b>Figure S1.</b> The fresh, chopped and dried, and grinded powder roots of <i>A. debrana</i> .....                                             | 2 |
| <b>Figure S2.</b> Acetone extract of the dried and powdered roots of <i>A. debrana</i> .....                                                    | 2 |
| <b>Figure S3.</b> <sup>1</sup> H–NMR (500 MHz, CDCl <sub>3</sub> ) spectrum of compound <b>3</b> .....                                          | 3 |
| <b>Figure S4.</b> <sup>13</sup> C–NMR (125 MHz, CDCl <sub>3</sub> ) spectrum of compound <b>3</b> .....                                         | 3 |
| <b>Figure S5.</b> DEPT (125 MHz, CDCl <sub>3</sub> ) spectrum of compound <b>3</b> .....                                                        | 4 |
| <b>Figure S6.</b> <sup>1</sup> H– <sup>1</sup> H COSY (500 MHz, CDCl <sub>3</sub> ) spectrum of compound <b>3</b> .....                         | 4 |
| <b>Figure S7.</b> HSQC (CDCl <sub>3</sub> ) spectrum of compound <b>3</b> ( <sup>1</sup> H: 500 MHz, <sup>13</sup> C: 125 MHz) .....            | 5 |
| <b>Figure S8.</b> HMBC (CDCl <sub>3</sub> ) spectrum of compound <b>3</b> ( <sup>1</sup> H: 500 MHz, <sup>13</sup> C: 125 MHz) .....            | 5 |
| <b>Figure S9.</b> Mass spectrum of compound <b>3</b> .....                                                                                      | 6 |
| <b>Figure S10.</b> <sup>1</sup> H–NMR (500 MHz, DMSO- <i>d</i> <sub>6</sub> ) spectrum of compound <b>5</b> .....                               | 6 |
| <b>Figure S11.</b> <sup>13</sup> C–NMR (125 MHz, DMSO- <i>d</i> <sub>6</sub> ) spectrum of compound <b>5</b> .....                              | 7 |
| <b>Figure S12.</b> DEPT (125 MHz, DMSO- <i>d</i> <sub>6</sub> ) spectrum of compound <b>5</b> .....                                             | 7 |
| <b>Figure S13.</b> <sup>1</sup> H– <sup>1</sup> H COSY (500 MHz, DMSO- <i>d</i> <sub>6</sub> ) spectrum of compound <b>5</b> .....              | 8 |
| <b>Figure S14.</b> HSQC (DMSO- <i>d</i> <sub>6</sub> ) spectrum of compound <b>5</b> ( <sup>1</sup> H: 500 MHz, <sup>13</sup> C: 125 MHz) ..... | 8 |

**Figure S15.** HMBC (DMSO-*d*<sub>6</sub>) spectrum of compound **5** (<sup>1</sup>H: 500 MHz, <sup>13</sup>C: 125 MHz) .....9

**Figure S16.** <sup>1</sup>H–NMR (500 MHz, DMSO-*d*<sub>6</sub>) spectrum of compound **6** .....9

**Figure S17.** <sup>13</sup>C–NMR (125 MHz, DMSO-*d*<sub>6</sub>) spectrum of compound **6** .....10

**Figure S18.** DEPT (125 MHz, DMSO-*d*<sub>6</sub>) spectrum of compound **6** .....10

**Figure S19.** <sup>1</sup>H–<sup>1</sup>H COSY (500 MHz, DMSO-*d*<sub>6</sub>) spectrum of compound **6** .....11

**Figure S20.** HSQC (DMSO-*d*<sub>6</sub>) spectrum of compound **6** (<sup>1</sup>H: 500 MHz, <sup>13</sup>C: 125 MHz) .....11

**Figure S21.** HMBC (DMSO-*d*<sub>6</sub>) spectrum of compound **6** (<sup>1</sup>H: 500 MHz, <sup>13</sup>C: 125 MHz) .....12

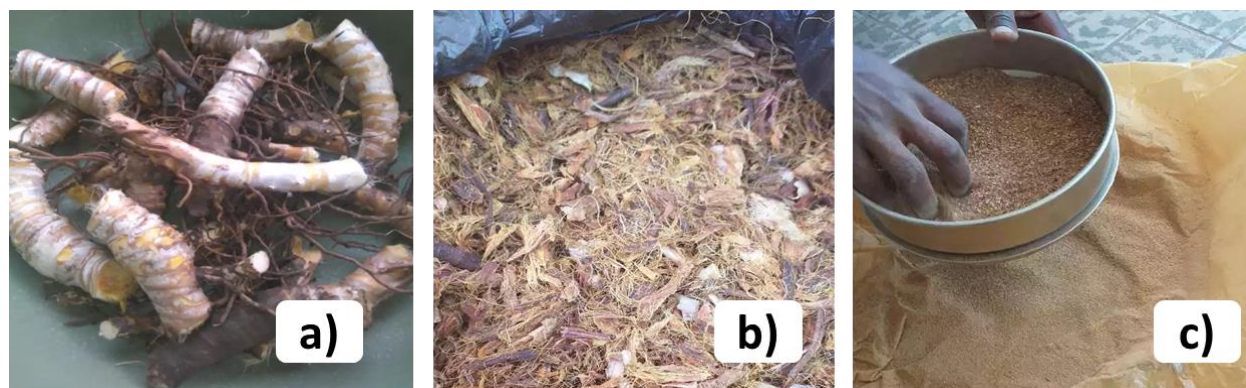

**Figure S1.** The fresh (a), chopped and dried (b) and grinded powder (c) roots of *A. debrana*

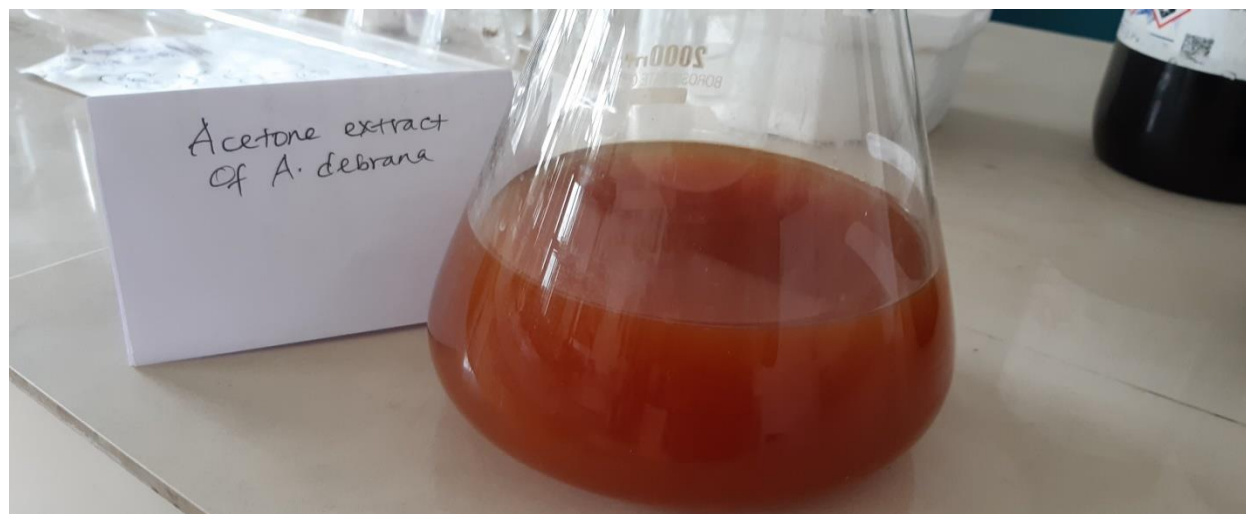

**Figure S2.** Acetone extract of the dried and powdered roots of *A. debrana*

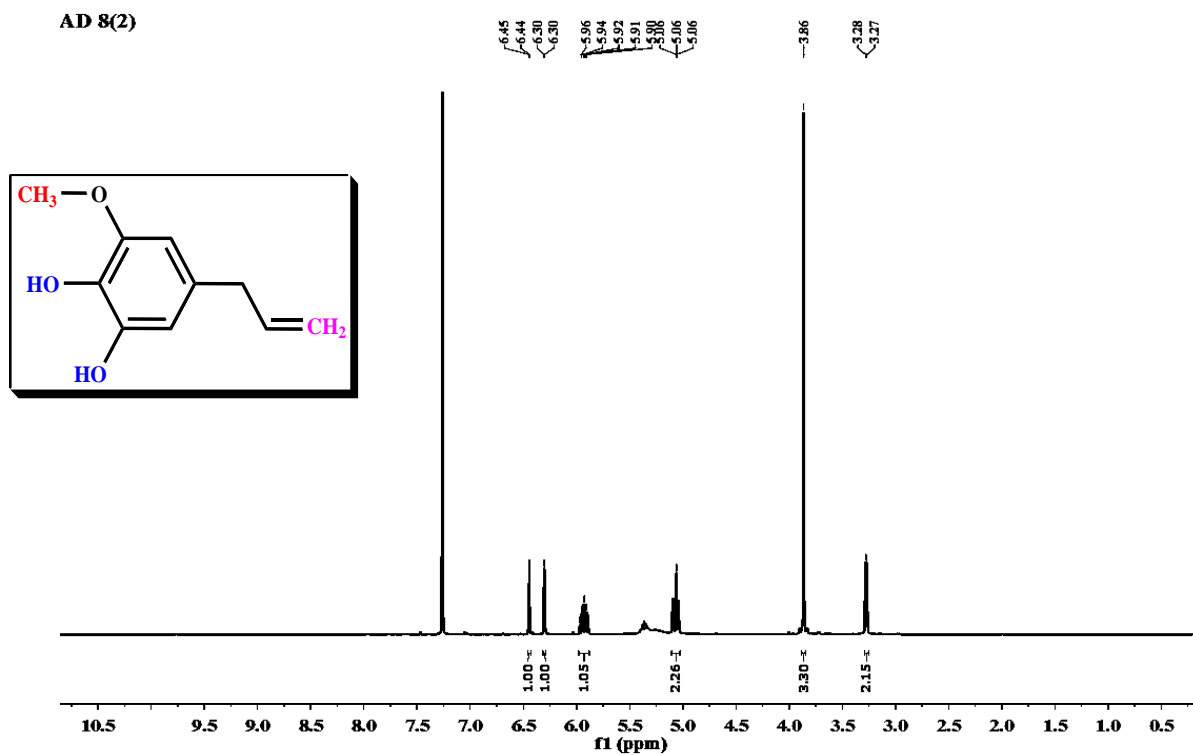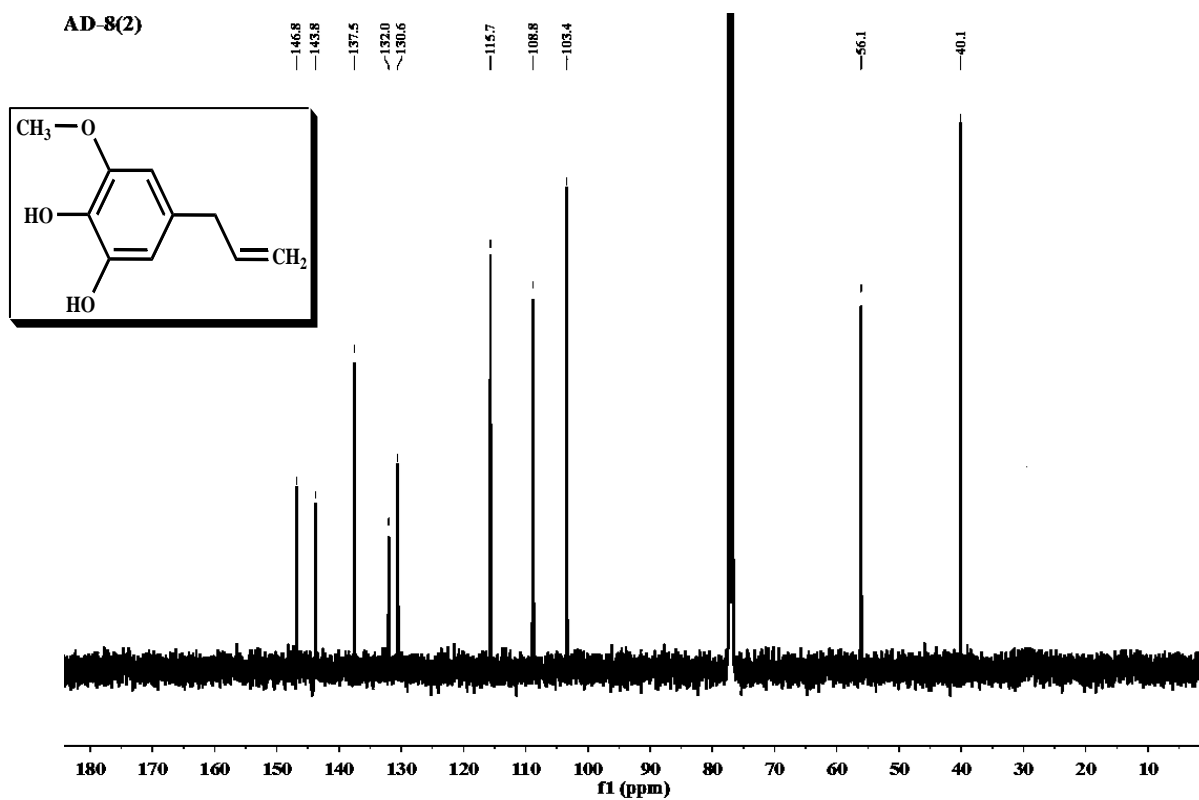

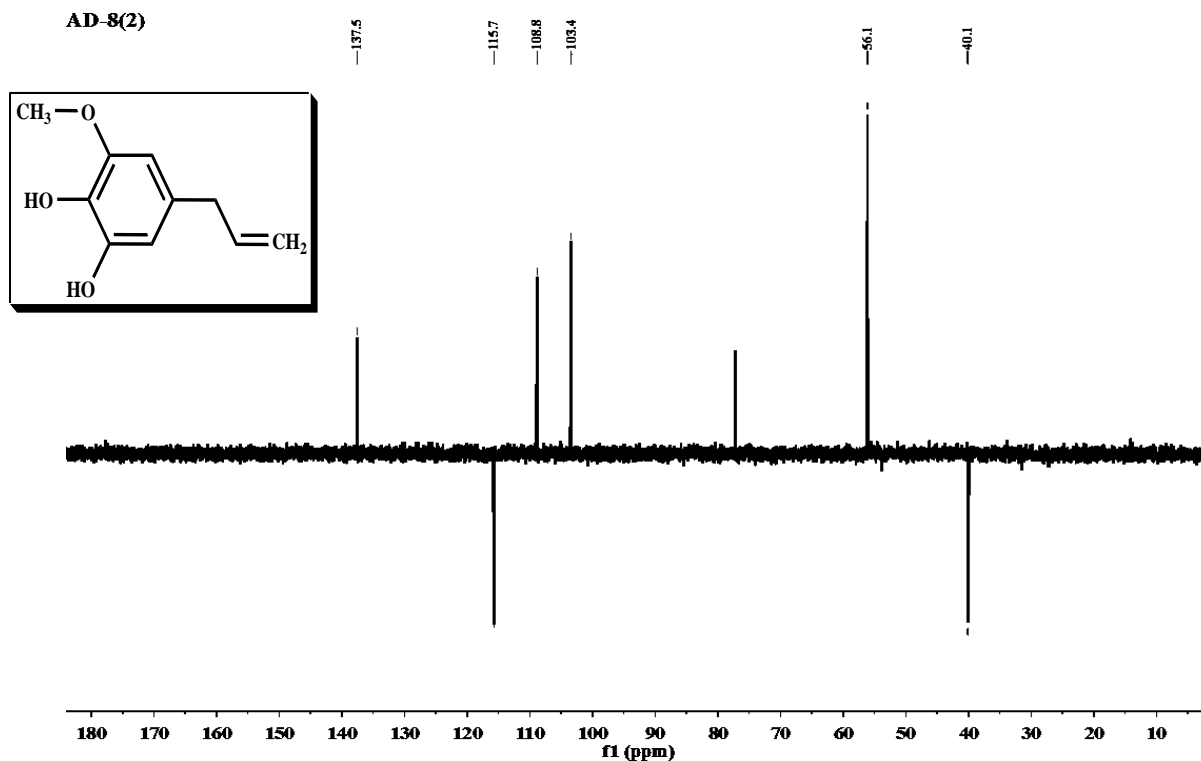

Figure S5. DEPT (125 MHz,  $\text{CDCl}_3$ ) spectrum of compound 3

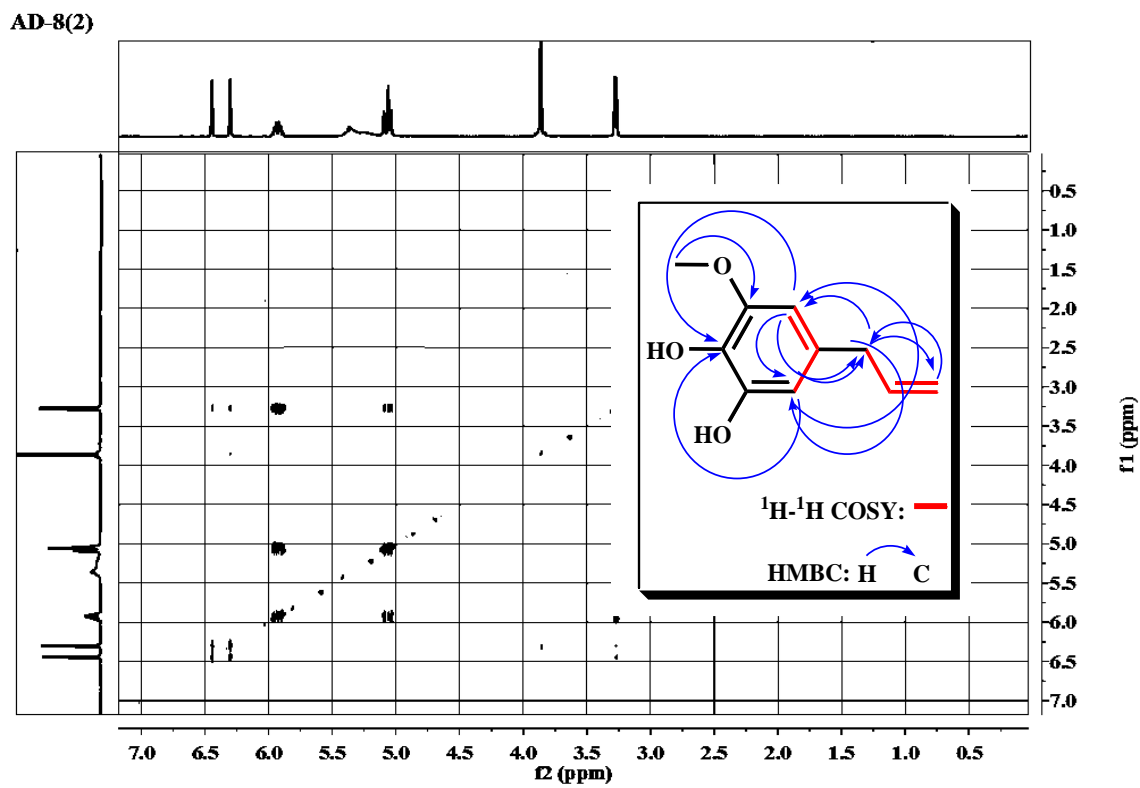

Figure S6.  $^1\text{H}-^1\text{H}$  COSY (500 MHz,  $\text{CDCl}_3$ ) spectrum of compound 3

AD-8(2)

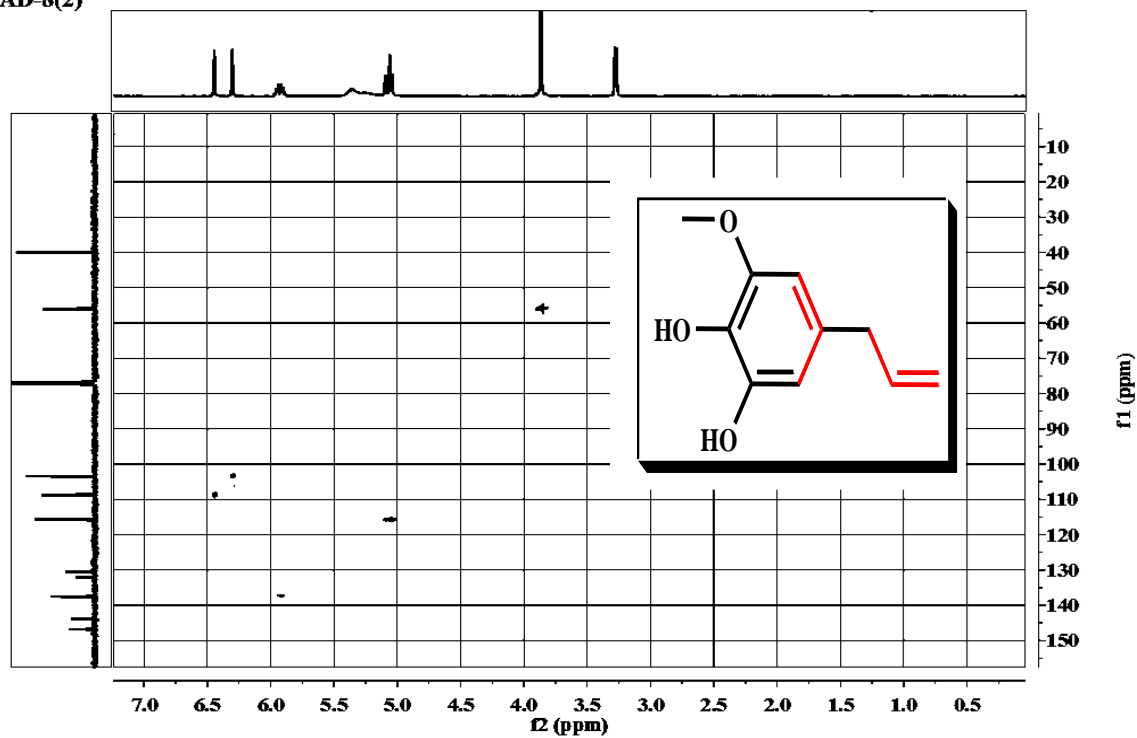

Figure S7. HSQC ( $\text{CDCl}_3$ ) spectrum of compound 3 ( $^1\text{H}$ : 500 MHz,  $^{13}\text{C}$ : 125 MHz)

AD-8(2)

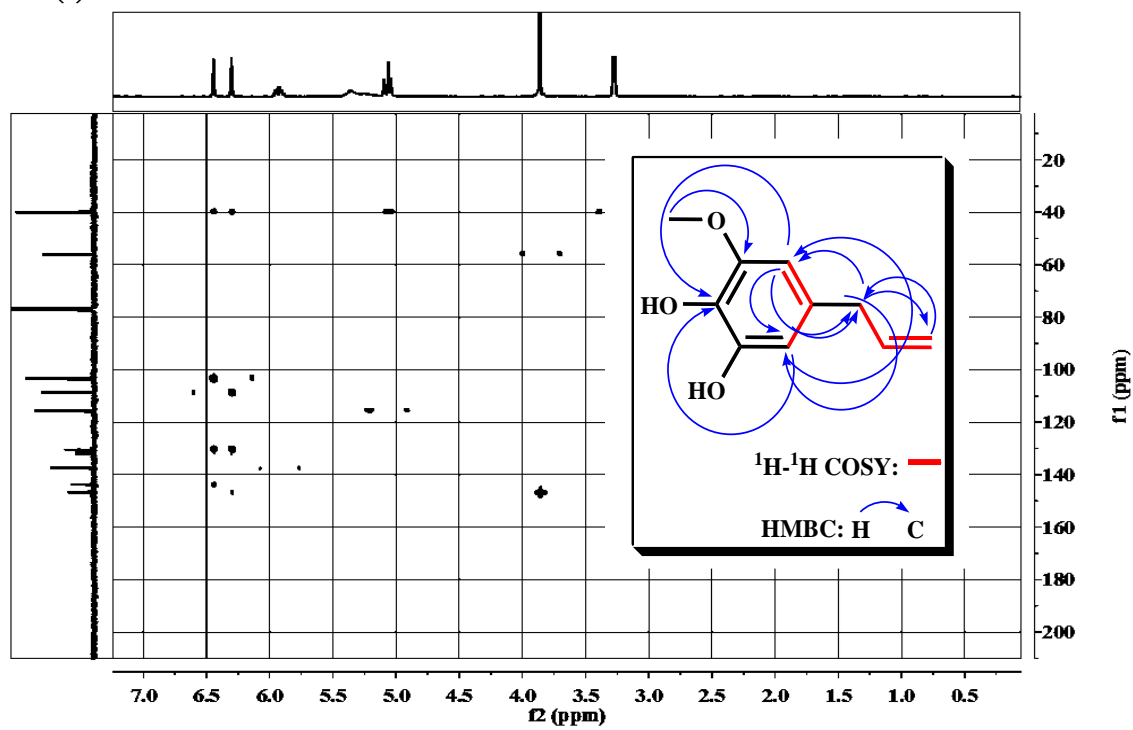

Figure S8. HMBC ( $\text{CDCl}_3$ ) spectrum of compound 3 ( $^1\text{H}$ : 500 MHz,  $^{13}\text{C}$ : 125 MHz)

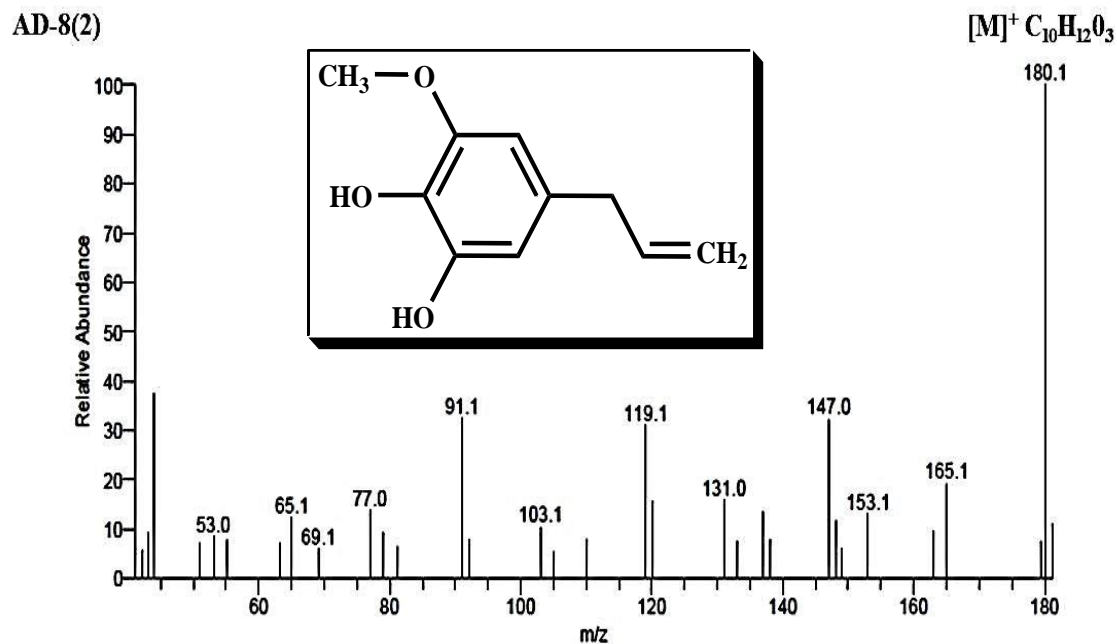

Figure S9. Mass spectrum of compound 3

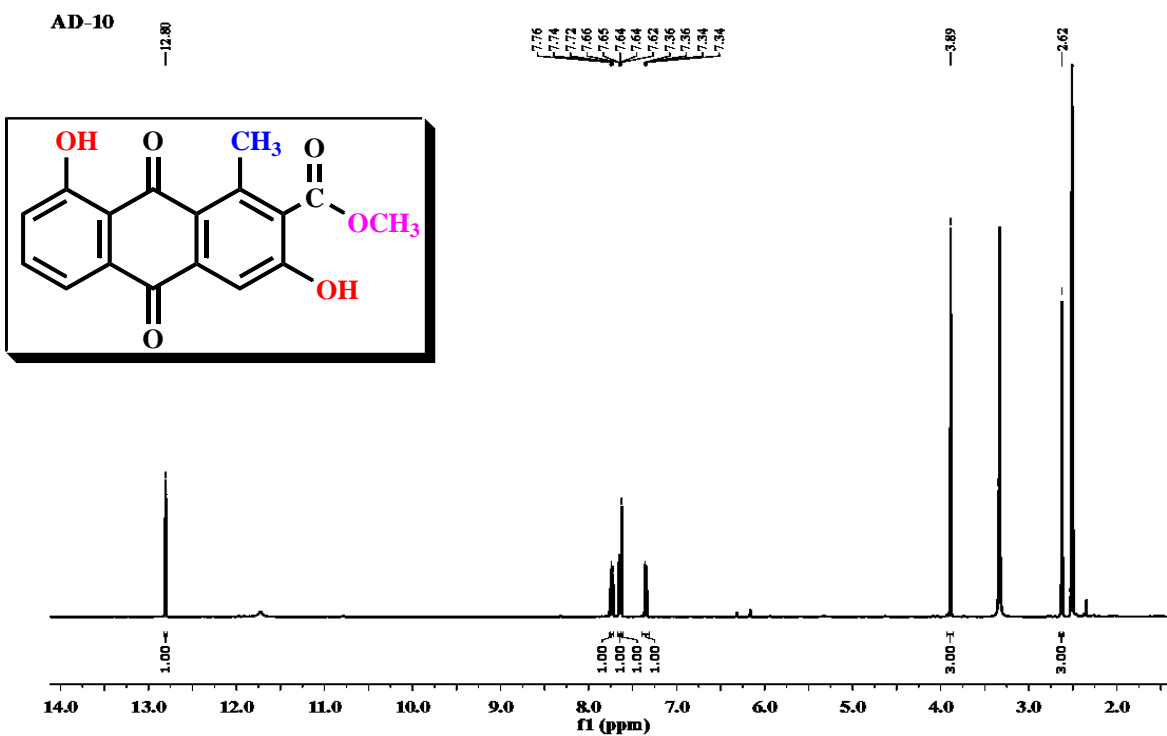

Figure S10. <sup>1</sup>H-NMR (500 MHz, DMSO-*d*<sub>6</sub>) spectrum of compound 5

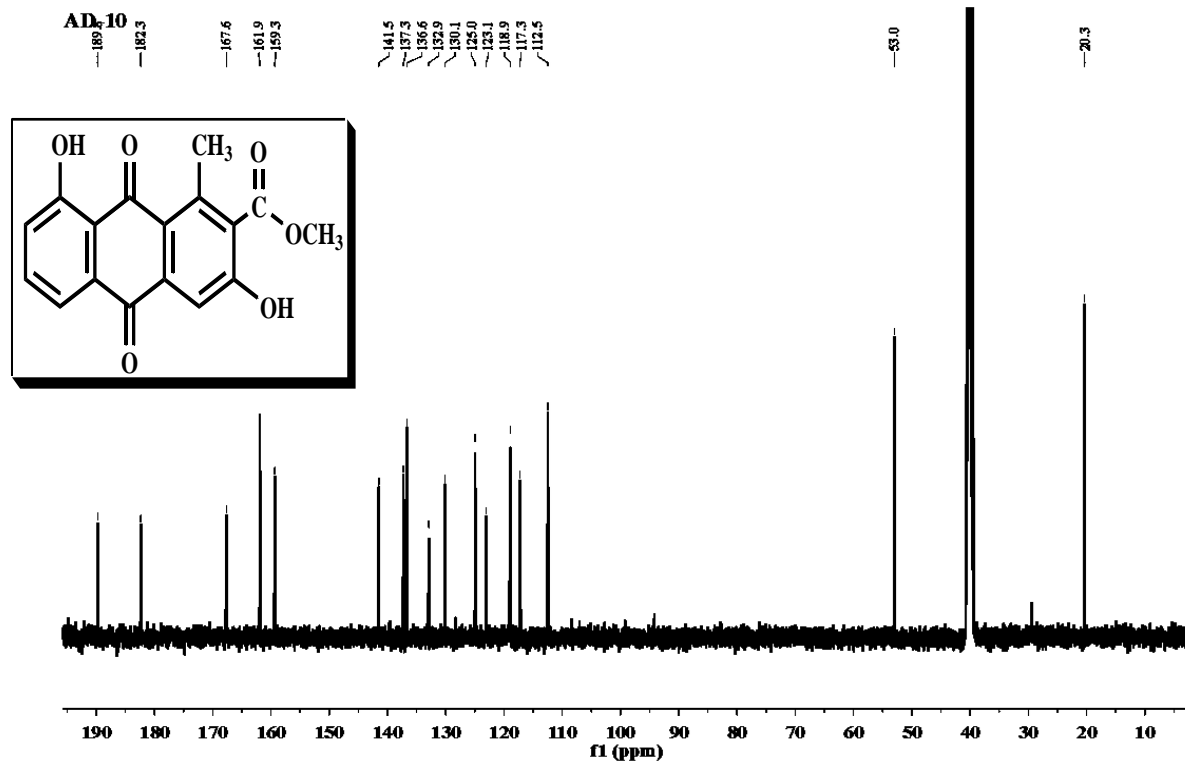

**Figure S11.** <sup>13</sup>C–NMR (125 MHz, DMSO-*d*<sub>6</sub>) spectrum of compound **5**

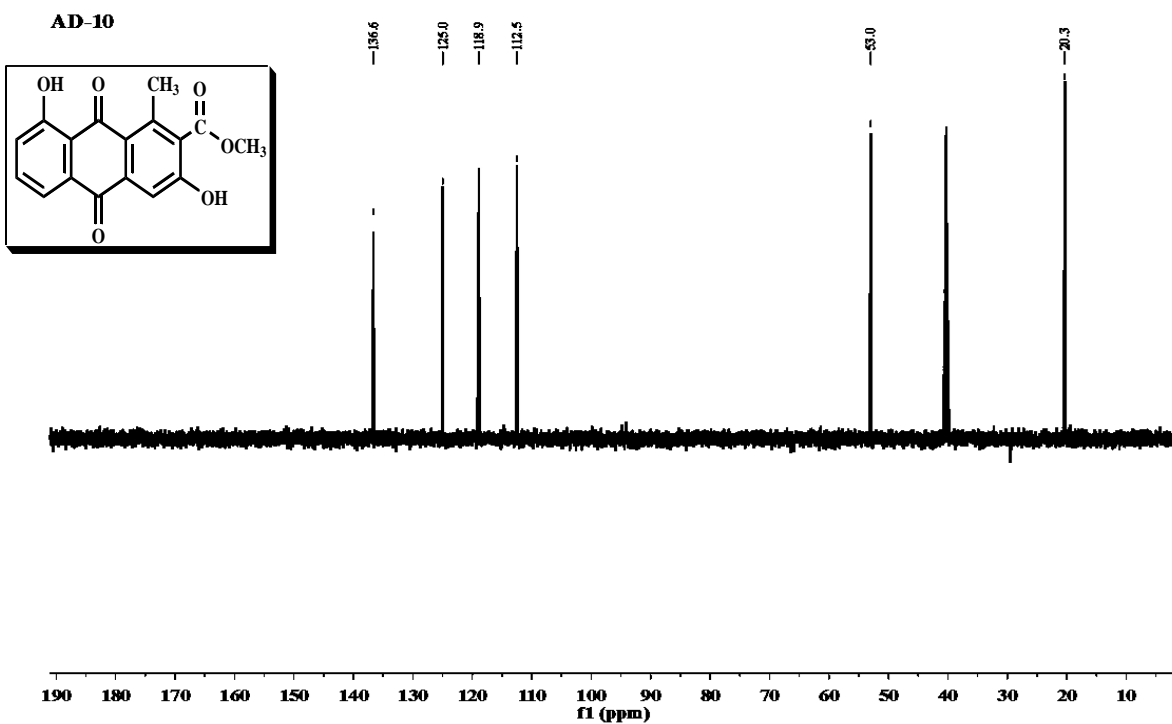

**Figure S12.** DEPT (125 MHz, DMSO-*d*<sub>6</sub>) spectrum of compound **5**

AD-10

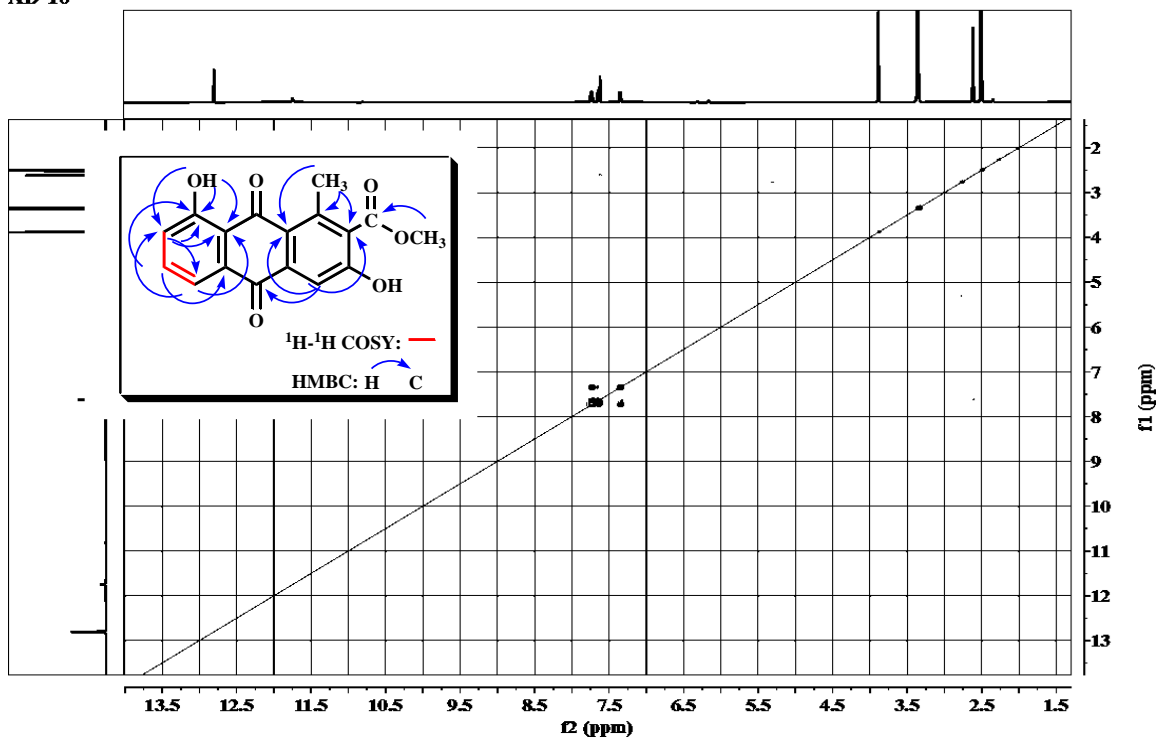

Figure S13.  $^1\text{H}$ - $^1\text{H}$  COSY (500 MHz,  $\text{DMSO-}d_6$ ) spectrum of compound 5

AD-10

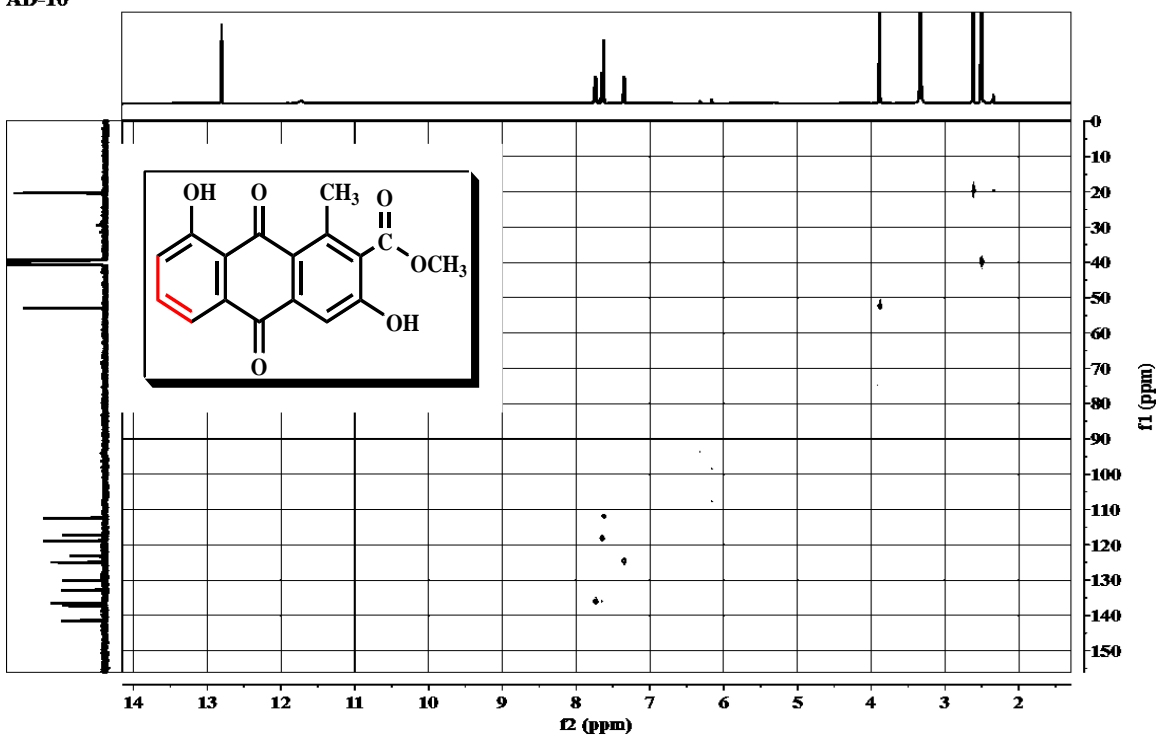

Figure S14. HSQC ( $\text{DMSO-}d_6$ ) spectrum of compound 5 ( $^1\text{H}$ : 500 MHz,  $^{13}\text{C}$ : 125 MHz)



AD-10

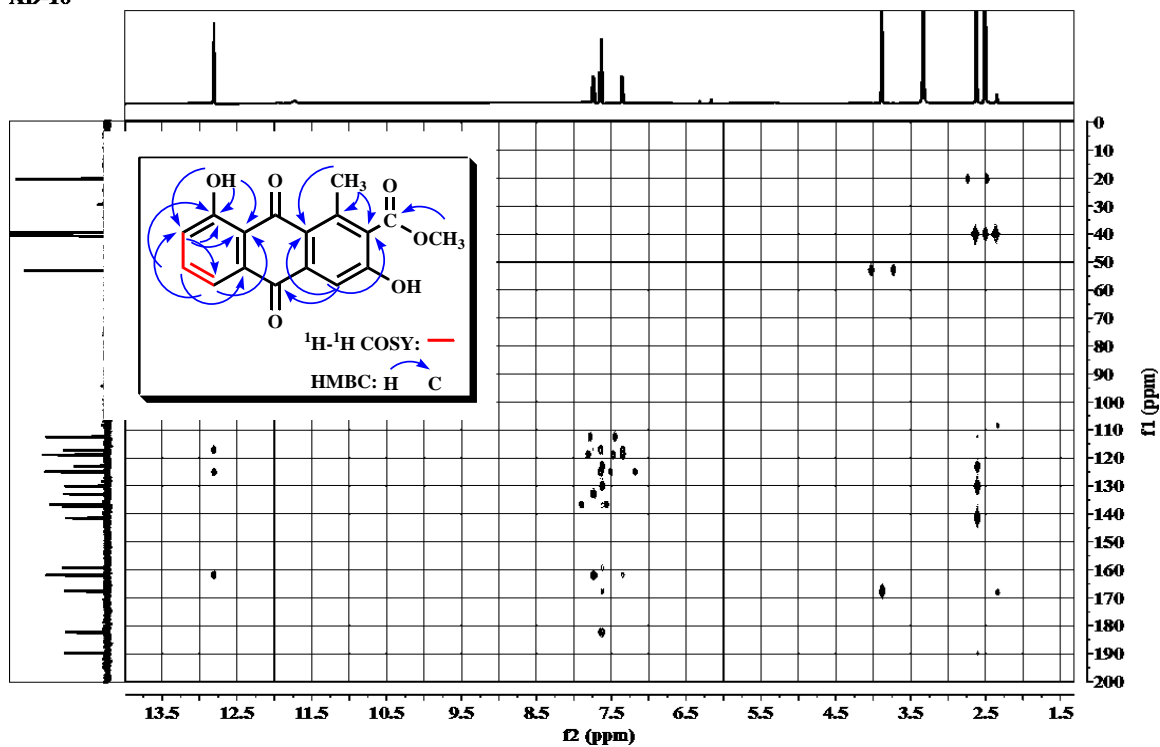

Figure S15. HMBC (DMSO- $d_6$ ) spectrum of compound **5** ( $^1\text{H}$ : 500 MHz,  $^{13}\text{C}$ : 125 MHz)

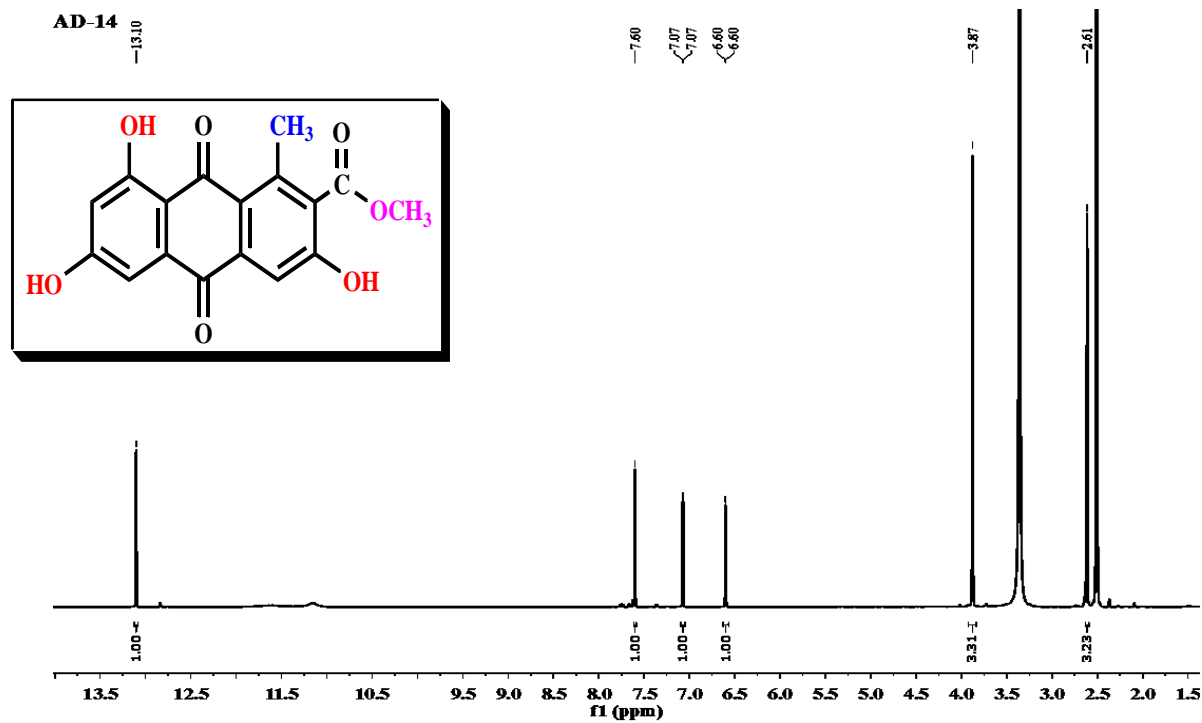

Figure S16.  $^1\text{H}$ -NMR (500 MHz, DMSO- $d_6$ ) spectrum of compound **6**

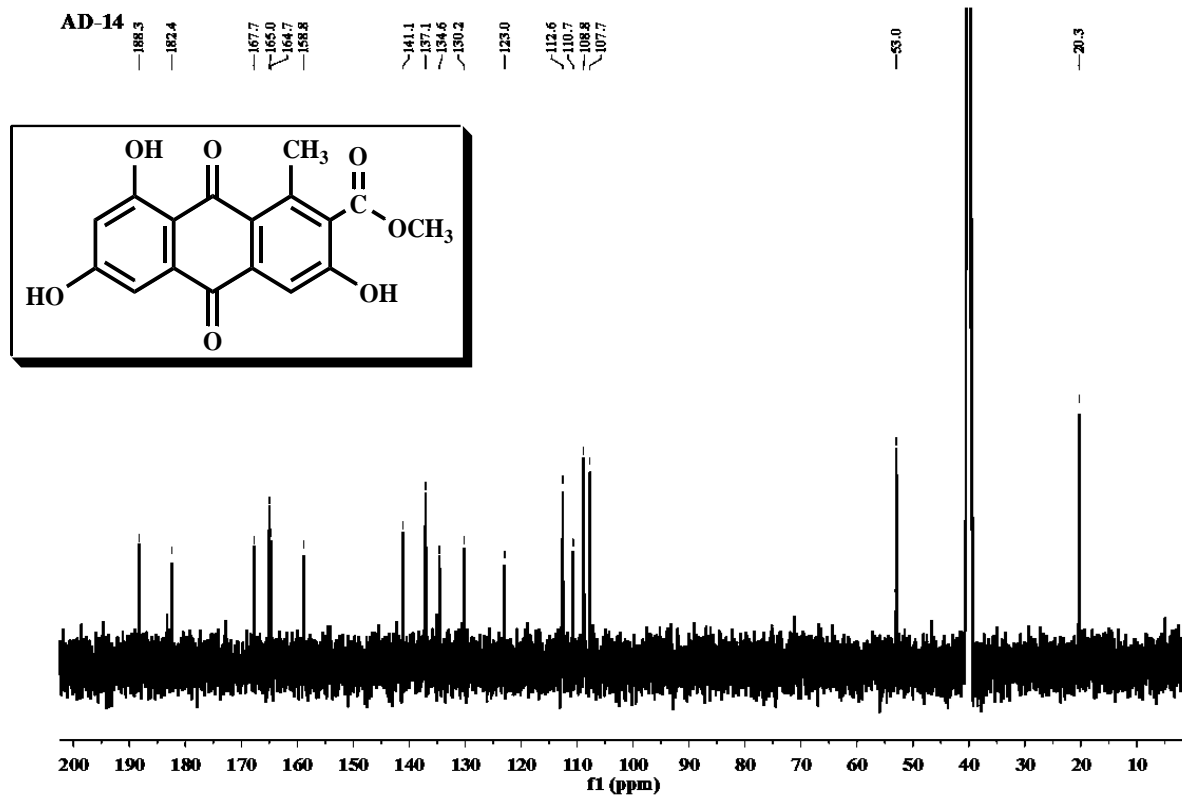

Figure S17.  $^{13}\text{C}$ -NMR (125 MHz,  $\text{DMSO-}d_6$ ) spectrum of compound 6

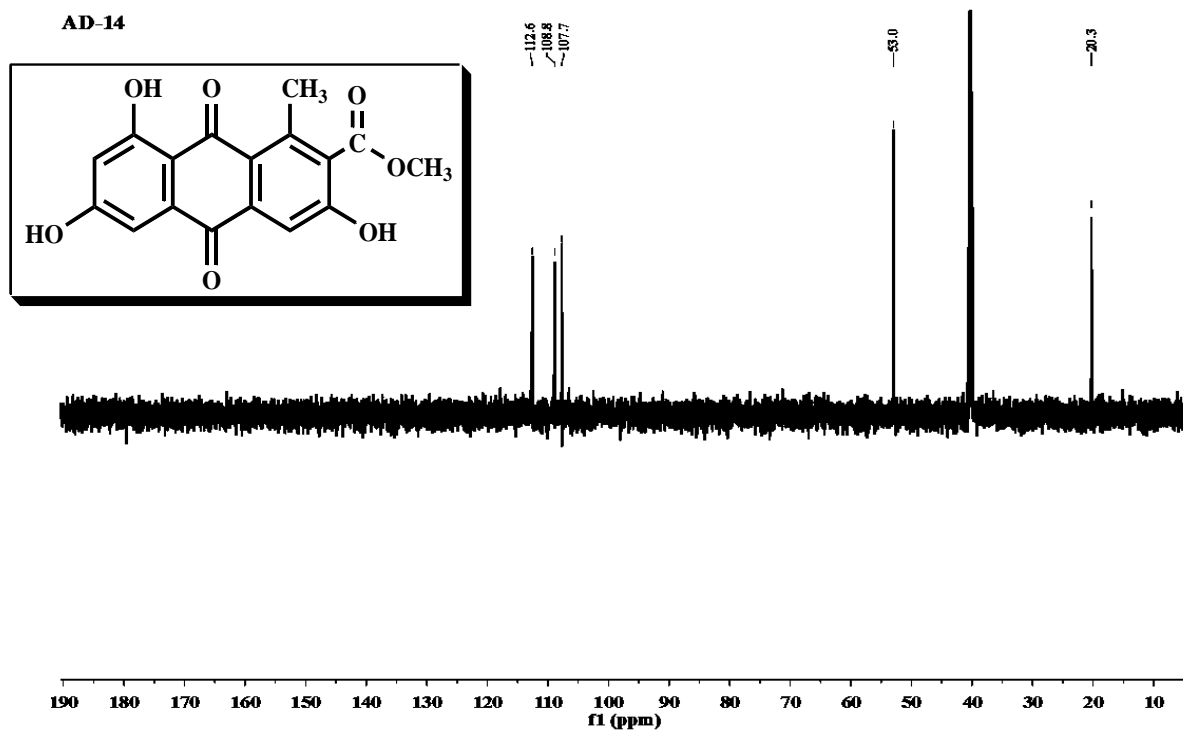

Figure S18. DEPT (125 MHz,  $\text{DMSO-}d_6$ ) spectrum of compound 6

AD-14

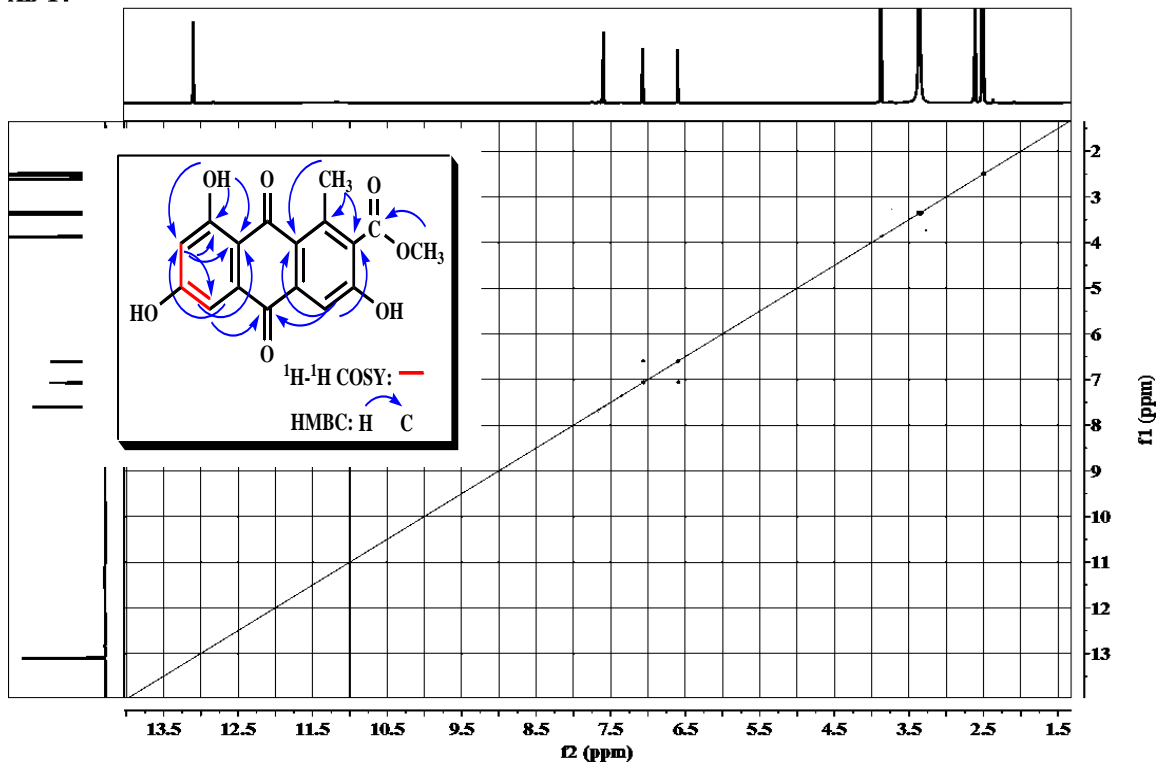

Figure S19.  $^1\text{H}$ - $^1\text{H}$  COSY (500 MHz,  $\text{DMSO-}d_6$ ) spectrum of compound **6**

AD-14

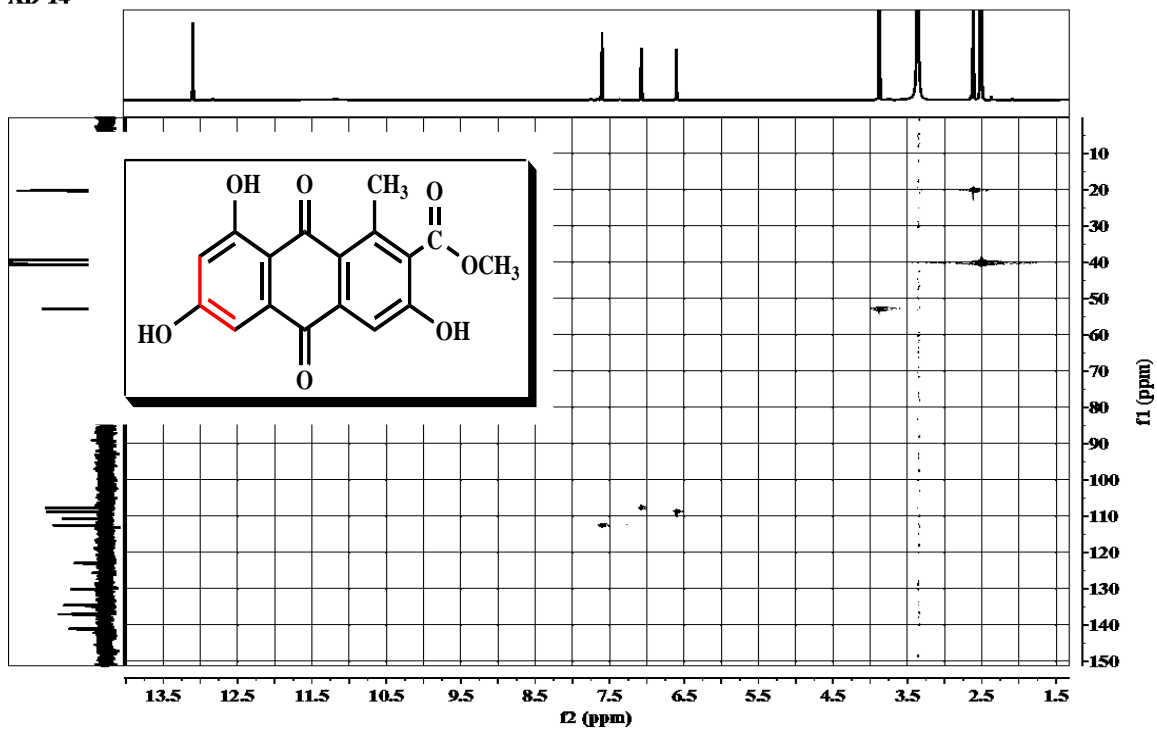

Figure S20. HSQC ( $\text{DMSO-}d_6$ ) spectrum of compound **6** ( $^1\text{H}$ : 500 MHz,  $^{13}\text{C}$ : 125 MHz)

AD-14

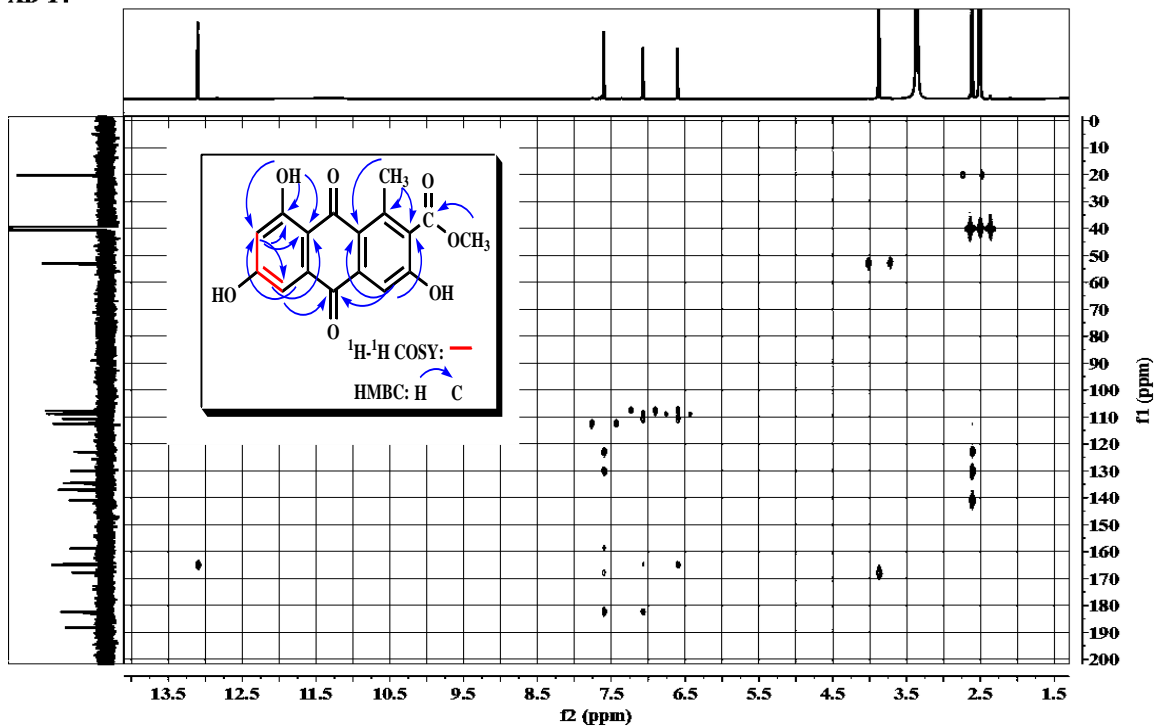

Figure S21. HMBC (DMSO- $d_6$ ) spectrum of compound 6 ( $^1\text{H}$ : 500 MHz,  $^{13}\text{C}$ : 125 MHz)
